# Supplementary material for: Ethylene regulates phosphorus remobilization and expression of a phosphate transporter (PhPT1) during petunia corolla senescence
Source: PubMed Central journal article supplement — J Exp Bot. 2009 Apr 20;60(7):2179–90. doi: 10.1093/jxb/erp092 (PMC2682506; doi:10.1093/jxb/erp092), 2009-04-20
Supplement: erp092_1.pdf [file erp092_1.pdf]

# Ethylene regulates phosphorus remobilization and expression of a phosphate transporter (*PhPT1*) during petunia corolla senescence

*Laura J Chapin and Michelle L Jones*

## **Supplementary Material**

Supplementary Table S1

Supplementary Figure S1

Table S1: Primers used for the quantitative RT-PCR of the *PhPT* genes and the *PhACTIN* control.

| Gene           | Accession# | Primer sequence (5' → 3')                            |
|----------------|------------|------------------------------------------------------|
| <i>PhACTIN</i> | CV299322   | AGCCAACAGAGAGAAGATGACCCA<br>ACACCATCACCAGAGTCCAACACA |
| <i>PhPT1</i>   | EF564180   | AAGCAATTCTCCGTCGTCATGGA<br>TAGCCTGGAACAGTACTGCAGAGA  |
| <i>PhPT2</i>   | EU532761   | GCTAAAGATGCGAAACGAGCAGCA<br>TCCATGACGACGAACAACTCCCA  |
| <i>PhPT3</i>   | EU532762   | AGCTAGGCTAAGATCAACGTGCCA<br>TGGGATCTGTGGATTGAGCAGCAT |
| <i>PhPT4</i>   | EU532763   | ATGTGTTAGCTTCCGCATTGACGC<br>TTATGCCTCCAACCTACGCCCAA  |
| <i>PhPT5</i>   | EU532764   | TTCTGTCCTAGCCCAAATGGCTCT<br>ACCCATTCCAGCAATGACAACTGC |

I

LePT1 -MANDLQVLNALDVAKTQLYHFTAIVIAGMGFFTDAYDLFCISMVTKLLGRLYYHHDGAL 59  
PhPT1 -MAKDLQVLTALDVAKTQLYHFTAIVIAGMGFFTDAYDLFCISLVTKLLGRIYYHHEGAL 59  
AtPht4 -----  
PhPT2 -----  
PhPT3 MAKDQLQVLNALDVAKTQLYHFTAIVIAGMGFFTDAYDLFCISLVTKLLGRIYYFHGEGAP 60  
PhPT4 MASDNLVVLNALDTARTQWYHVTAIVIAGMGFFTDAYDLFCISTVSKLLGRLYYYDPSTK 60  
PhPT5 MASNNLVNLNALDTAHTQWYHVTAVVIAGMGFFTDAYDLFCISTISKLLGRLYYYDPHTH 60

II III

LePT1 KPGSLPPNVSAAVNGVAFCGTLAQLFFGWLGDKMGRKKVYGMTLMIMVICSIASGLSFG 119  
PhPT1 KPGSLPPNVAAAVNGVAFCGTLAQLFFGWLGDKLGKGRKKVYGMTLMLMVICSIASGLSFG 119  
AtPht4 -----MTLMVMVLCIASGLSFG 18  
PhPT2 -----  
PhPT3 KPGILPSGISAAVNGVAFIGTSLGQLVFGLGDKLGKGRKKVYGMTLMLMVICSIAACGLSFG 120  
PhPT4 APGKLPHMANNWVIGVALVGTLSGQLVFGWLGDKLGKGRKKVYGLTLILMVICALCSGLSLG 120  
PhPT5 APGKLPHTVNNWVTGVALVGTLTGQLVFGWLGDKLGKGRKKVYGLTLILMVICALSSGLSFG 120

IV V

LePT1 HTPKGVMTTLCFFRFWLGFGLGGDYPLSATIMSEYANKKTRGAFIAAVFAMQGFILAGG 179  
PhPT1 HTPKSVMATLTCFFRFWLGFGLGGDYPLSATIMSEYANKKTRGAFIAAVFAMQGFILAGG 179  
AtPht4 HEPKAVMATLTCFFRFWLGFGLGGDYPLSATIMSEYANKKTRGAFVSAVFAMQGFIMAGG 78  
PhPT2 -----  
PhPT3 KTANGVIATLTCFFRFWLGFGLGGDYPLSATIMSEYANKKTRGAFIAAVFAMQGFILAGG 180  
PhPT4 YSPKSVIGTLCFFRFWLGFGLGGDYPLSATIMSEYANKSTRGAFIAAVFAMQGVGIIFAG 180  
PhPT5 YSRKVVIIGTLCFFRFWLGFGLGGDYPLSATIMSEYANKRTRGAFIAAVFAMQGVGIIFAG 180

VI

LePT1 MVAIVSAAFKGAFAPAPAYEVDIAIGSTVPQADVFVWRIILMFGAIPAGLTYWRMKMPETA 239  
PhPT1 MVAIVSAAFKNQFPAPAYKDGALASTISQADVFVWRIIVMFGAIPALTYYWRMKMPETA 239  
AtPht4 IFAI I ISSAFEAKFPSPAYADDALGSTIPQADLVWRIILMAGAI PAAMTYYSRSKMPETA 138  
PhPT2 -----TA 2  
PhPT3 IVALIVSAGFKNAYPAPTYSAHGKDSTPEADYVWRIIVMIGALPALLTYWRMKMPETA 240  
PhPT4 LVSMTISKVFLMNFEGKPFNVDEVLSTEPEADYVWRIVLMLGALPALLTYWRMKMPETG 240  
PhPT5 LVLMTVSKVFLMRYAGKAFSTDEVFSTEPEADYVWRIVLMLGALPALLTYWRMKMPETG 240

\* .

LePT1 RYTALVAKNLKQAANDMSKVLQVEIEAEPEKVTAISEAKGANDFGLFTKEFLRRHGLHLL 299  
PhPT1 RYTALVAKNLKQATNDMSKVLQVEIEPEQEKEVEEISQG---NDFGLFTKQFLRRHGLHLL 296  
AtPht4 RYTALVAKDAKQAASDMSKVLQVEIEPEQQKLEEISKEK-SKAFGLFSKEFMSRHGLHLL 197  
PhPT2 RYTALVAKDAKRAADMCKVLHVEIDPEDAKVERMAKDE-SNQFGLFSWEFVRRHGLHLF 61  
PhPT3 RYTALVAKNTVKAADMCKVLNVEIEEDKATVEKIEENG--NSFGLFSKEFLRRHGLHLL 298  
PhPT4 RYTAIEEGNAKQAAIDMGKVLDEIEIQAEQDKLAQFKAAN---EYSLLSNEFFQRHGLHLI 297  
PhPT5 RYTAIEEGNAKQAAIDMGKVLDEIEIQAEQEKLAQFKAAN---DYSLLSNEFFQRHGLHLI 297  
\*\*\*\*: : \*\*: \*\*.\*:\*\*\*:\*\*\*: : .: : : .:\*\*\*: \*. \*\*\*\*\*:

VII VIII

LePT1 GTASTWFLLDIAFYSONLFQKDFSAIGWIPPAQTMNALEEVYKIARAQTLIALCSTVPG 359  
PhPT1 GTASTWFLLDIAFYSONLFQKDFSAIGWIPPAETMNALEEVYRIARAQTLIALCSTVPG 356  
AtPht4 GTTSTWFLLDIAFYSONLFQKDFSAIGWIPPAQSMNAIQEVFKIARAQTLIALCSTVPG 257  
PhPT2 GTCSTWFLLDIAFYSONLFQKDVFTAIGWIPPAKTMNAVQEVYKIARAQTLIALCSTVPG 121  
PhPT3 GTTSTWFLLDIAFYSONLFQKDFSKIGWIPPPETMNALEEVYRIARAQTLIALCSTVPG 358  
PhPT4 GTMSTWFLLDIAFYSONLTQKDFIPVMGLTSKANTISALREMFETS RAMFVIALFGTFPG 357  
PhPT5 GTMSTWFLLDIAFYSONLTQKDFIPTMGLVSDAKSISALREMFETS RAMFVIALLGTFPG 357  
\*\* \*\*\*\*\*:\*\*\*:\*. :\* . .:\*\*\*:\*\*\*: .\*\*\* :\*\*\* .\*\*\*

IX X

LePT1 YWFTVAFIDKIGRFQAIQLMGFFFMTVFMFALAI PYHHWTLKDHRI GFVVMYSFTFFFANF 419  
PhPT1 YWFTVAFIDKIGRFQAIQLMGFFFMTVFMFALAI PYTHWTHKDNRI GFVIMYSLTFFFANF 416  
AtPht4 YWFTVAFIDVIGRFQAIQMMGFFFMTVFMFALAI PYNHWTHKENRI GFVIMYSLTFFFANF 317
